# Supplementary material
Source: MDPI journal article supplement (https://www.mdpi.com/2311-7524/7/10/351)
Supplement: s1 [file s1 › horticulturae-1380895-supplementary.pdf]

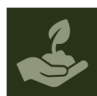

*Supplementary Information 1*

(A) DEMOGRAPHIC DATA

Name of Tehsil..... Name of Village.....Rural .....

Sr. No.....Age.....Education.....

1.

2.

(B) ETHNOVETERINARY PLANT USES

1. Plant (Local / Vernacular name)

2. Plant identified as..... (Botanical name)

3. Habit of the plant (Trees/Shrubs/Herbs/Climbers/Grasses/Other)

4. Part(s) of plant used.....

5. Nature of ailment treated.....

6. Route of administration (a) Oral (b) Topical.

7. Response of the informant(s).

(a) Effective/Good..... (b) Fair..... (c) Poor.....

(C) INFORMANTS DECLARATION

We, the above-mentioned, have voluntarily agreed to participate in this study with our full consent, and we declare that the information and knowledge given in the interview and discussion is correct and complete to the best of our knowledge.

Dated: .....
